# Supplementary material for: Genome-wide identification and evolution of the SAP gene family in sunflower (Helianthus annuus L.) and expression analysis under salt and drought stress
Source: PeerJ journal article supplement (doi:10.7717/peerj.17808), 2024-07-30

zf-A20  
zf-AN1

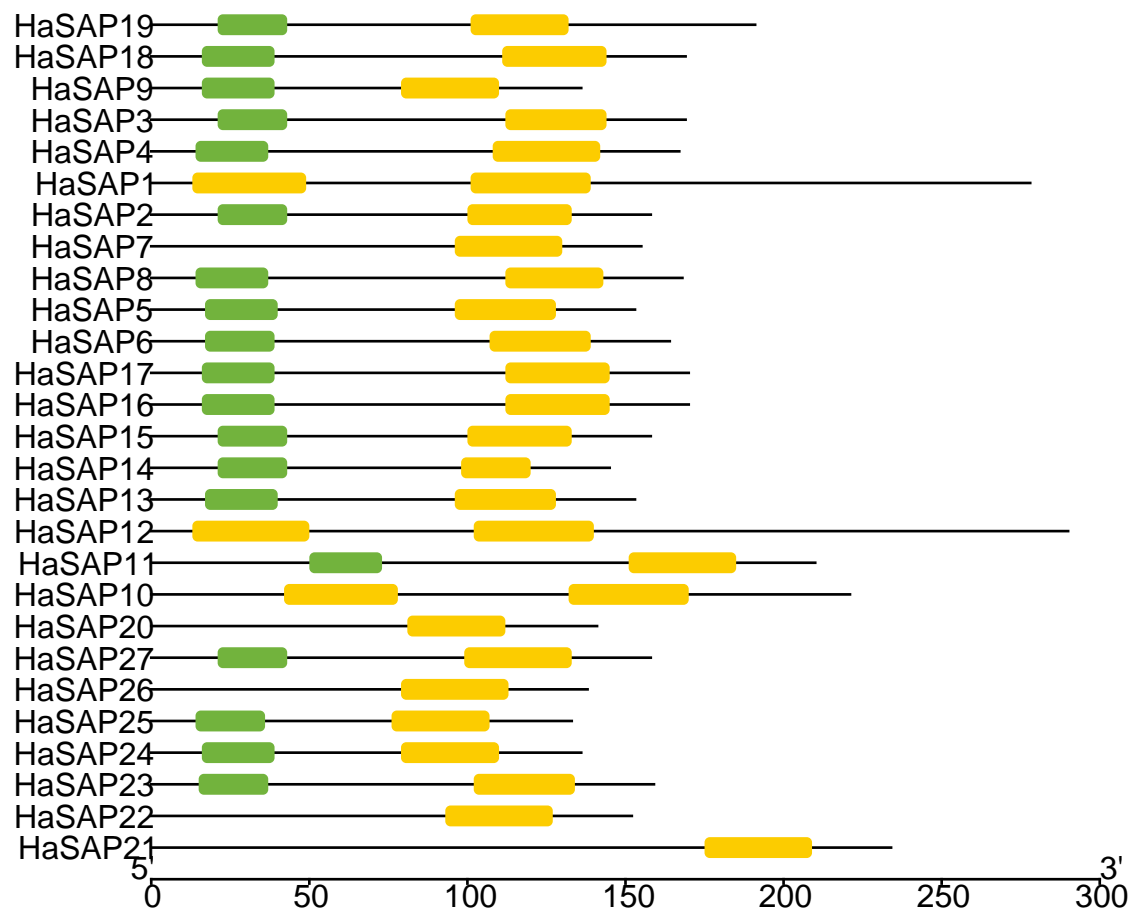

Supplement: Fig_S1.pdf [file Fig_S1.pdf]
