# Supplementary material for: Genome-wide identification and evolution of the SAP gene family in sunflower (Helianthus annuus L.) and expression analysis under salt and drought stress
Source: PeerJ. 2024 Jul 30;12:e17808. doi: 10.7717/peerj.17808 (PMC11296301; doi:10.7717/peerj.17808)
Supplement: Supplemental Information 2 [file peerj-12-17808-s002.xlsx]

## Sheet: Sheet1
Table S1.All primers used in this study
gene_name	primer sequences
HaSAP1-F	ACGGACCAGTTCGGCTAAT
HaSAP1-R	CGCTATTCTGACCACTCTTATCG
HaSAP3-F	GAGATGCGATTGCCAAGG
HaSAP3-R	TCCAAACCCGACCTAACC
HaSAP8-F	AAAGAGGCGATTGCGAGG
HaSAP8-R	ACCAAACCAACCGTCCGA
HaSAP10-F	ATGGGAGGAGGAACAGAGG
HaSAP10-R	TGACAACCGTCGCATTTG
HaSAP15-F	ATCTGGCTCTCGTAGGTCTC
HaSAP15-R	CACTTCCTTATCTATCTTCACAACC
HaSAP16-F	GCATCGTCAACGGACAAA
HaSAP16-R	TTTCGGCTTCTCACTGCTC
HaSAP21-F	CGCATCATCGCTCTTTCTG
HaSAP21-R	CCTTCTTCCACCGTTTCTACC
HaSAP22-F	CCTCTCTCTCGTCCTAATCAGC
HaSAP22-R	ATCTACGGTCATCTGTGGCG
HaSAP23-F	TCTCCTGGTGGGTTAGCCT
HaSAP23-R	CTCGTGAGCGACCGATTT
HaSAP26-F	CGCTTGTGGTGACAGATGA
HaSAP26-R	ATCCGCTCAAACCGACTCT
HaActin-F	ATCAGGAGACAGATGAAAGCG
HaActin-R	CCCAAAGTACACCTGGTCAAG
