# Supplementary material for: Genome-wide identification and evolution of the SAP gene family in sunflower (Helianthus annuus L.) and expression analysis under salt and drought stress
Source: PeerJ. 2024 Jul 30;12:e17808. doi: 10.7717/peerj.17808 (PMC11296301; doi:10.7717/peerj.17808)
Supplement: Supplemental Information 3 [file peerj-12-17808-s003.xlsx]

## Sheet: Sheet1
qRT-PCR raw data under salt stress
gene_name	Time	Ct-1	Ct-2	Ct-3				average	P-value
Actin	0h	20.49	20.62	20.65
	1h	21.4	21.53	21.46
	3h	21	20.94	21.07
	6h	21.06	20.96	21.23
	12h	22.69	22.72	22.6
	24h	21.07	21	21.14
HaSAP1	0h	25.83	25.81	25.97	1	1	1	1
	1h	27.22	27.24	27.15	0.716978	0.697372	0.773782	0.729377	0.0035461
	3h	27.32	26.89	27.25	0.50698	0.590496	0.550953	0.549476	0.00142706
	6h	27.91	27.62	27.99	0.351111	0.360982	0.368567	0.36022	0.0031193
	12h	29.35	29.15	29.11	0.400535	0.423373	0.438303	0.420737	0.000179618
	24h	27.44	27.17	27.45	0.48971	0.50698	0.503478	0.500056	5.55643e-05
HaSAP3	0h	23.44	23.46	23.18	1	1	1	1
	1h	24.37	24.41	24.01	0.986233	0.972655	0.986233	0.981707	0.0680547
	3h	23.85	23.74	23.48	1.07177	1.02811	1.08673	1.06221	0.0557271
	6h	25.11	24.95	24.83	0.466516	0.450625	0.476319	0.464487	9.76858e-05
	12h	27.47	27.34	27.03	0.281265	0.291183	0.267943	0.28013	4.3731e-05
	24h	25.42	25.29	25.09	0.378929	0.366021	0.373712	0.372888	1.78673e-05
HaSAP8	0h	26.39	26.42	26.44	1	1	1	1
	1h	27.05	27.23	26.92	1.18921	1.07177	1.25701	1.17266	0.0728816
	3h	25.86	25.79	25.91	2.05623	1.93187	1.93187	1.97332	0.000904397
	6h	24.91	24.91	25.15	4.14106	3.605	3.65533	3.80046	0.0018521
	12h	27.28	27.18	27.09	2.47942	2.53151	2.46229	2.49107	9.74183e-05
	24h	27.05	26.87	26.99	0.946058	0.952638	0.959264	0.952653	0.0532106												HaSAP1 HaSAP3 HaSAP8 (Nacl stress)
HaSAP10	0h	26.11	26.33	26.05	1	1	1	1
	1h	24.89	25.05	24.69	4.37717	4.56305	4.50023	4.48015	0.000122982
	3h	25.54	25.63	25.48	2.11404	2.02792	1.98618	2.04271	0.000650316
	6h	26.01	25.95	25.88	1.59107	1.64718	1.68179	1.64002	0.000850662
	12h	28.42	28.57	28.15	0.926588	0.907519	0.90125	0.911786	0.0636887
	24h	26.43	26.39	26.18	1.19748	1.24833	1.28343	1.24308	0.0951856
HaSAP15	0h	23.57	23.65	23.62	1	1	1	1
	1h	24.04	24.17	23.99	1.3566	1.31039	1.3566	1.3412	0.00101595
	3h	24.69	24.63	24.77	0.655197	0.632878	0.602904	0.630326	0.000837597
	6h	25.43	25.46	25.59	0.408951	0.360982	0.381565	0.383833	0.000254027
	12h	25.87	25.83	25.69	0.933033	0.946058	0.920188	0.933093	0.611529
	24h	24.01	24.07	24.12	1.10191	0.972655	0.993092	1.02255	0.315299
HaSAP16	0h	25.66	25.49	25.43	1	1	1	1
	1h	26.39	26.25	26.11	1.13288	1.10957	1.09429	1.11225	0.492225
	3h	26.92	26.54	26.51	0.594604	0.602904	0.632878	0.610129	0.000443911
	6h	27.66	27.26	27.41	0.371131	0.371131	0.378929	0.37373	8.61366e-06
	12h	29.68	29.52	29.39	0.283221	0.262429	0.248273	0.264641	9.52127e-05
	24h	27.55	27.21	27.22	0.403321	0.395021	0.406126	0.401489	1.55158e-05												HaSAP10 HaSAP15 HaSAP16 (Nacl stress)
HaSAP21	0h	23.02	22.93	23.09	1	1	1	1
	1h	23.43	23.38	23.45	1.41421	1.37554	1.36604	1.38527	0.0307295
	3h	22.98	22.69	23.01	1.46409	1.47427	1.41421	1.45086	0.0208448
	6h	22.48	22.21	22.56	2.15846	2.08493	2.15846	2.13395	0.000233403
	12h	23.28	22.98	23.03	3.83706	4.14106	4.02782	4.00198	0.000435989
	24h	22.61	22.37	22.53	1.98618	1.91853	2.07053	1.99175	0.00097982
HaSAP22	0h	27.62	27.48	27.49	1	1	1	1
	1h	26.63	26.42	26.37	3.73213	3.91768	3.81055	3.82012	0.000181713
	3h	25.68	25.39	25.36	5.46416	5.31474	5.85634	5.54508	0.000630076
	6h	25.25	24.85	25.16	7.67411	7.83536	7.51618	7.67522	9.52405e-05
	12h	27.79	27.65	27.49	4.08405	3.81055	3.86375	3.91945	0.000410671
	24h	27.29	26.88	27.02	1.87905	1.97247	1.94531	1.93227	0.0404422
HaSAP23	0h	29.19	29.26	29.31	1	1	1	1
	1h	26.82	26.92	26.84	9.71356	9.51366	9.71356	9.64693	2.96893e-05
	3h	26.58	26.47	26.64	8.69388	8.63383	8.51496	8.61422	2.3833e-05
	6h	27.67	27.37	27.62	4.25748	4.69134	4.82323	4.59068	0.00112878
	12h	29.97	29.96	29.89	2.67586	2.63902	2.58471	2.63319	0.000131322
	24h	29.19	29.05	29.18	1.49485	1.50525	1.53688	1.51232	0.0523039												HaSAP21 HaSAP22 HaSAP23 (Nacl stress)
HaSAP26	0h	26.12	26.28	26.09	1	1	1	1
	1h	26.69	26.87	26.55	1.26576	1.24833	1.27456	1.26288	0.100429
	3h	26.47	26.42	26.39	1.11729	1.13288	1.08673	1.1123	0.0871272
	6h	27.09	26.99	27.03	0.757858	0.773782	0.779165	0.770268	0.000387193
	12h	29.58	29.62	29.38	0.417544	0.423373	0.395021	0.411979	0.000108026
	24h	26.82	26.87	26.74	0.920188	0.864537	0.895025	0.89325	0.0509854
																					HaSAP26 (Nacl stress)
