# Supplementary material for: Genome-wide identification and evolution of the SAP gene family in sunflower (Helianthus annuus L.) and expression analysis under salt and drought stress
Source: PeerJ. 2024 Jul 30;12:e17808. doi: 10.7717/peerj.17808 (PMC11296301; doi:10.7717/peerj.17808)
Supplement: Supplemental Information 4 [file peerj-12-17808-s004.xlsx]

## Sheet: Sheet1
Tissue-specific qRT-PCR raw data
gene_name	Tissue	Ct-1	Ct-2	Ct-3				average	P-value
Actin	Root	20.29	20.19	20.31
	Stem	20.45	20.39	20.59
	Leaf	22.38	22.23	22.37
HaSAP1	Root	26.21	26.08	26.07	1	1	1	1
	Stem	27.88	27.71	27.89	0.351111	0.371131	0.343885	0.355376	7.98844e-05
	Leaf	29.59	29.47	29.52	0.408951	0.392292	0.381565	0.394269	8.64809e-05
HaSAP3	Root	23.29	23.36	23.45	1	1	1	1
	Stem	24.34	24.46	24.66	0.539614	0.535887	0.524858	0.533453	4.50747e-05
	Leaf	27.33	27.17	27.11	0.258816	0.293209	0.329877	0.293967	0.000421694
HaSAP8	Root	26.14	26.08	26.15	1	1	1	1
	Stem	27.15	27.24	27.46	0.554785	0.514057	0.48971	0.519517	0.000778607
	Leaf	26.26	26.16	26.06	3.91768	3.89062	4.43828	4.08219	0.00166327
HaSAP10	Root	24.37	24.45	24.52	1	1	1	1
	Stem	28.52	28.65	28.66	0.0629347	0.0625	0.0688691	0.0647679	2.41269e-06
	Leaf	23.85	24.03	24.19	6.10504	5.50217	5.24157	5.61626	0.00152712
HaSAP15	Root	23.45	23.53	23.44	1	1	1	1
	Stem	24.28	24.51	24.44	0.628507	0.582367	0.607097	0.60599	0.00057139
	Leaf	27.46	27.35	27.25	0.264255	0.291183	0.297302	0.284247	0.000100535
HaSAP16	Root	24.91	24.99	25.03	1	1	1	1
	Stem	25.96	25.98	26.22	0.539614	0.578344	0.532185	0.550048	0.000504946
	Leaf	27.78	27.93	28.01	0.582367	0.535887	0.528509	0.548921	0.0006969
HaSAP21	Root	23.95	24.04	24.08	1	1	1	1
	Stem	24.63	24.63	24.87	0.697372	0.76313	0.702222	0.720908	0.00284884
	Leaf	26.02	26.11	26.17	1.01396	0.97942	0.97942	0.990933	0.256746														HaSAP1 HaSAP3 HaSAP8 HaSAP10 HaSAP15 HaSAP16 HaSAP21 (Tissue)
HaSAP22	Root	23.14	23.13	23.28	1	1	1	1
	Stem	25.15	25.19	25.31	0.277392	0.275476	0.297302	0.28339	4.73998e-05
	Leaf	26.45	26.27	26.57	0.429283	0.466516	0.426317	0.440706	0.000267174
HaSAP23	Root	25.84	25.81	25.95	1	1	1	1
	Stem	28.18	28.27	28.45	0.220676	0.208772	0.214641	0.214696	9.5741e-06
	Leaf	26.45	26.39	26.54	2.78949	2.75108	2.77022	2.77026	1.96081e-05
HaSAP26	Root	25.49	25.33	25.51	1	1	1	1
	Stem	26.71	26.49	26.74	0.479632	0.514057	0.517632	0.503774	0.000297758
	Leaf	29.76	29.61	29.81	0.220676	0.211686	0.211686	0.214683	7.27933e-06
																							HaSAP22 HaSAP23 HaSAP26 (Tissue)
