# Supplementary material for: Genome-wide identification and evolution of the SAP gene family in sunflower (Helianthus annuus L.) and expression analysis under salt and drought stress
Source: PeerJ. 2024 Jul 30;12:e17808. doi: 10.7717/peerj.17808 (PMC11296301; doi:10.7717/peerj.17808)
Supplement: Supplemental Information 5 [file peerj-12-17808-s005.xlsx]

## Sheet: Sheet1
qRT-PCR raw data under drought stress
gene_name	Time	Ct-1	Ct-2	Ct-3				average	P-value
Actin	0h	20.49	20.62	20.65
	1h	21.41	21.53	21.46
	3h	21.05	20.94	21.07
	6h	21.06	20.96	21.23
	12h	22.69	22.72	22.61
	24h	21.07	21.02	21.14
HaSAP1	0h	26.78	27.02	26.96	1	1	1	1
	1h	27.76	28.01	27.85	0.959264	0.946058	0.946058	0.95046	0.103902
	3h	28.25	28.18	28.23	0.532185	0.558644	0.554785	0.548538	0.000166961
	6h	29.39	29.25	29.37	0.243164	0.269807	0.281265	0.264745	0.000117771
	12h	30.73	31.05	30.93	0.297302	0.262429	0.248273	0.269335	0.000198655
	24h	28.21	28.18	28.28	0.554785	0.590496	0.562529	0.56927	0.000316729
HaSAP3	0h	24.23	24.37	24.18	1	1	1	1
	1h	24.43	24.56	24.31	1.64718	1.64718	1.60214	1.63217	0.000281797
	3h	21.76	21.56	21.59	8.1681	8.75435	8.05564	8.32603	0.00043652
	6h	22.96	22.99	23.09	3.5801	3.29436	3.18215	3.3522	0.0012634
	12h	25.22	25.26	24.86	2.31338	2.31338	2.42839	2.35171	0.000401727
	24h	24.18	24.21	23.99	1.54756	1.47427	1.60214	1.54132	0.0623252
HaSAP8	0h	24.81	24.96	24.89	1	1	1	1
	1h	25.45	25.65	25.55	1.21419	1.16473	1.10957	1.16283	0.163777
	3h	26.62	26.48	26.59	0.420448	0.435275	0.411796	0.422506	7.0451e-05
	6h	27.28	27.05	27.22	0.267943	0.297302	0.297302	0.287516	9.43016e-05
	12h	28.41	28.27	28.36	0.378929	0.432269	0.351111	0.387436	0.00075378
	24h	25.92	25.81	25.86	0.692555	0.732043	0.716978	0.713858	0.000806422														HaSAP1 HaSAP3 HaSAP8 (PEG stress)
HaSAP10	0h	21.96	21.75	21.86	1	1	1	1
	1h	22.89	22.71	22.68	0.993092	0.965936	0.993092	0.98404	0.10997
	3h	22.46	22.04	22.15	1.04247	1.02101	1.09429	1.05259	0.0684108
	6h	22.52	22.05	22.46	1.00696	1.02811	0.986233	1.0071	0.308235
	12h	24.02	23.72	23.73	1.10191	1.09429	1.06437	1.08686	0.0847734
	24h	22.36	22.08	22.25	1.13288	1.04972	1.07177	1.08479	0.0681697
HaSAP15	0h	25.51	25.66	25.57	1	1	1	1
	1h	24.58	24.71	24.53	3.605	3.63008	3.605	3.61336	5.11442e-06
	3h	23.86	23.67	23.73	4.62675	4.95883	4.78991	4.79183	0.000319299
	6h	23.87	23.67	23.71	4.62675	5.02805	5.42642	5.02707	0.00163491
	12h	24.59	24.69	24.52	8.69388	8.39773	8.05564	8.38242	0.00031167
	24h	23.73	23.69	23.67	5.1337	5.16941	5.24157	5.18156	2.87808e-05
HaSAP16	0h	25.91	25.87	25.79	1	1	1	1
	1h	25.95	25.97	25.79	1.84038	1.75321	1.75321	1.78227	0.000688326
	3h	24.55	24.41	24.33	3.78423	3.43426	3.68075	3.63308	0.000775233
	6h	23.69	23.51	23.67	6.9163	6.49802	6.49802	6.63745	0.00030556
	12h	26.51	26.51	26.16	3.03143	2.75108	3.01049	2.931	0.00108653
	24h	25.75	25.67	25.67	1.67018	1.51572	1.52626	1.57072	0.0376744														HaSAP10 HaSAP15 HaSAP16 (PEG stress)
HaSAP21	0h	23.58	23.66	23.49	1	1	1	1
	1h	23.76	23.71	23.41	1.67018	1.81504	1.85318	1.77946	0.00253761
	3h	22.35	22.13	22.32	3.45815	3.605	3.01049	3.35788	0.00285035
	6h	22.04	21.99	22.11	4.31691	4.02782	3.89062	4.07845	0.000830725
	12h	22.53	22.45	22.11	9.51366	9.91766	10.1261	9.85246	0.000206054
	24h	22.56	22.39	22.38	3.03143	3.18215	3.03143	3.08167	0.000290954
HaSAP22	0h	23.56	23.55	23.66	1	1	1	1
	1h	24.51	24.62	24.49	0.97942	0.895025	0.986233	0.953559	0.127105
	3h	23.75	23.72	23.77	1.29235	1.10957	1.23971	1.21388	0.089436
	6h	23.92	23.81	24.11	1.15669	1.05702	1.09429	1.10267	0.0658427
	12h	25.66	25.51	25.45	1.07177	1.10191	1.12506	1.09958	0.0515835
	24h	23.96	23.83	24.12	1.13288	1.08673	1.02101	1.08021	0.660403
HaSAP23	0h	27.28	27.23	27.38	1	1	1	1
	1h	27.72	27.53	27.64	1.39474	1.52626	1.46409	1.4617	0.00335026
	3h	25.35	25.12	25.36	5.61778	5.38893	5.42642	5.47771	0.000125189
	6h	24.86	24.73	25.11	7.94474	7.1602	7.21	7.43831	0.000774078
	12h	27.46	27.08	27.17	4.05584	4.75683	4.50023	4.43763	0.00176465
	24h	26.63	26.57	26.62	2.34567	2.08493	2.37841	2.26967	0.00265282														HaSAP21 HaSAP22 HaSAP23 (PEG stress)
HaSAP26	0h	25.86	25.89	25.69	1	1	1	1
	1h	24.22	24.22	24.01	5.89708	5.9794	5.61778	5.83142	0.000256309
	3h	24.67	24.61	24.51	3.36359	3.03143	3.03143	3.14215	0.00133035
	6h	25.37	25.19	25.14	2.08493	2.05623	2.18859	2.10992	0.000654593
	12h	27.69	27.52	27.32	1.29235	1.38511	1.25701	1.31149	0.0635287
	24h	26.38	26.22	26.17	1.04247	1.04972	1.00696	1.03305	0.0847555
																							HaSAP26 (PEG stress)
