# Supplementary material for: Genome-wide identification and evolution of the SAP gene family in sunflower (Helianthus annuus L.) and expression analysis under salt and drought stress
Source: PeerJ. 2024 Jul 30;12:e17808. doi: 10.7717/peerj.17808 (PMC11296301; doi:10.7717/peerj.17808)
Supplement: Supplemental Information 6 [file peerj-12-17808-s006.xls]

## Sheet: Sheet1
ITEM TO CHECK	IMPORTANCE	CHECKLIST	Page/line number
EXPERIMENTAL DESIGN
Definition of experimental and control groups	E	Expression analysis of stress treatment 0 h is the control group, and drought and salt stress are the laboratory. Tissue expression analysis: Roots were the control group, and stems and leaves were the experimental groups.	Page 3, lines 104-108
Number within each group	E	three	Page 3, lines 108-109
Assay carried out by core lab or investigator's lab?	D	Hetao College Laboratory	Page 1, lines 5
Acknowledgement of authors' contributions	D	Chun Zhang	Page 1, lines 4
SAMPLE
Description	E	After 4 true leaves were cultured	Page 3, lines 104-108
Volume/mass of sample processed	D	0.2g	Page 4, lines 155-156
Microdissection or macrodissection	E	macrodissection	Page 4, lines 155-156
Processing procedure	E	rhizome and leaf samples were first taken and then treated as follows: salt stress treatment, plants were treated with 200 mmol/L NaCl, and samples were taken at 0 h, 1 h, 3 h, 6 h, 12 h and 24 h. Samples were taken after 0 h, 1 h, 3 h, 6 h, 12 h and 24 h with 15% PEG-6000.	Page 3, lines 104-108
If frozen - how and how quickly?	E	frozen at –80°C after flash freezing with liquid nitrogen	Page 3, lines 108-109
If fixed - with what, how quickly?	E	no	no
Sample storage conditions and duration (especially for FFPE samples)	E	Store in -80℃ refrigerator for 5 days	Page 3, lines 108-109
NUCLEIC ACID EXTRACTION
Procedure and/or instrumentation	E	Mortar, high speed benchtop refrigerated centrifuge	Page 4, lines 155-156
Name of kit and details of any modifications	E	To isolate total RNA, the FastPure Plant Total RNA Isolation Kit (Novozan Biotechnology Co., Ltd., Nanjing) was used	Page 4, lines 155-156
Source of additional reagents used	D	no	no
Details of DNase or RNAse treatment	E	Transfer the supernatant to FastPure gDNA-Filter ColumnⅡ, centrifuge at 12,000 rpm (13,400 × g) for 2 minutes, and collect the filtrate.	Page 4, lines 155-156
Contamination assessment (DNA or RNA)	E	Electrophoresis detection	Page 4, lines 155-156
Nucleic acid quantification	E	The ratio of A260/A280 nm can be used to evaluate the purity of RNA extracted from a sample.	Page 4, lines 155-156
Instrument and method	E	Multiskan Sky	Page 4, lines 155-156
Purity (A260/A280)	D	Sheet2	MIQE checklist, Sheet2
Yield	D	Sheet2	MIQE checklist,Sheet2
RNA integrity method/instrument	E	Multiskan Sky,The ratio of A260/A280 nm can be used to evaluate the purity of RNA extracted from a sample.	Page 4, lines 155-156
RIN/RQI or Cq of 3' and 5' transcripts	E	qRT-PCR raw data	qRT-PCR raw data
Electrophoresis traces	D
Inhibition testing (Cq dilutions, spike or other)	E	qRT-PCR raw data	qRT-PCR raw data
REVERSE TRANSCRIPTION
Complete reaction conditions	E	Sheet3	MIQE checklist, Sheet3
Amount of RNA and reaction volume	E	Sheet3	MIQE checklist, Sheet3
Priming oligonucleotide (if using GSP) and concentration	E	50 μM/L	Page 4, lines 159-160
Reverse transcriptase and concentration	E	Sheet3	MIQE checklist, Sheet3
Temperature and time	E	60℃/30S	Page 4, lines 160-163
Manufacturer of reagents and catalogue numbers	D	TaKaRa	Page 4, lines 160-163
Cqs with and without RT	D*	Sheet3	MIQE checklist, Sheet3
Storage conditions of cDNA	D	-20℃	Page 4, lines 160-163
qPCR TARGET INFORMATION
If multiplex, efficiency and LOD of each assay.	E	no	no
Sequence accession number	E	Table S1	Table S1
Location of amplicon	D	no	no
Amplicon length	E	Table S1	Table S1
In silico specificity screen (BLAST, etc)	E	Primer Premier 5.0	Page 4, lines 158
Pseudogenes, retropseudogenes or other homologs?	D	no	no
Sequence alignment	D	no	no
Secondary structure analysis of amplicon	D	no	no
Location of each primer by exon or intron (if applicable)	E	exon	Page 4, lines 158
What splice variants are targeted?	E	all	Page 4, lines 158
qPCR OLIGONUCLEOTIDES
Primer sequences	E	Table S1	Table S1
RTPrimerDB Identification Number	D	no	no
Probe sequences	D**	Table S1	Table S1
Location and identity of any modifications	E	Table S1	Table S1
Manufacturer of oligonucleotides	D	Sangon Bioengineering (China, Shanghai) Co., Ltd.	Page 4, lines 158-159
Purification method	D	PAGE	Page 4, lines 158-159
qPCR PROTOCOL
Complete reaction conditions	E	The qRT‒PCR protocol involved an initial denaturation step at 95°C for 30 seconds, followed by denaturation at 95°C for 10 seconds, annealing at 60°C for 30 seconds, extension at 72°C for 20 seconds, for a total of 40 cycles.	Page 4, lines 160-163
Reaction volume and amount of cDNA/DNA	E	2μl	MIQE checklist, Sheet3
Primer, (probe), Mg++ and dNTP concentrations	E	50 μM/L	MIQE checklist, Sheet3
Polymerase identity and concentration	E	SYBR® Premix Ex Taq™ (Tli RNaseH Plus) (2×Conc.)*1 1.0 ml	MIQE checklist, Sheet3
Buffer/kit identity and manufacturer	E	TaKaRa DRR041A	MIQE checklist, Sheet3
Exact chemical constitution of the buffer	D
Additives (SYBR Green I, DMSO, etc.)	E	SYBR® Premix Ex Taq™ (Tli RNaseH Plus) (2×Conc.)	MIQE checklist, Sheet3
Manufacturer of plates/tubes and catalog number	D	AxygenPCR-96M2-HS-C	MIQE checklist, Sheet3
Complete thermocycling parameters	E	The qRT‒PCR protocol involved an initial denaturation step at 95°C for 30 seconds, followed by denaturation at 95°C for 10 seconds, annealing at 60°C for 30 seconds, extension at 72°C for 20 seconds, for a total of 40 cycles.	Page 4, lines 160-163
Reaction setup (manual/robotic)	D	manual	MIQE checklist, Sheet3
Manufacturer of qPCR instrument	E	ChamQ Universal SYBR qPCR Master Mix (Novozan Biotechnology Co., Ltd., Nanjing)	Page 4, lines 160-163
qPCR VALIDATION
Evidence of optimisation (from gradients)	D
Specificity (gel, sequence, melt, or digest)	E	electrophoresis	MIQE checklist, Sheet3
For SYBR Green I, Cq of the NTC	E	no	no
Standard curves with slope and y-intercept	E	qRT-PCR raw data	qRT-PCR raw data
PCR efficiency calculated from slope	E	qRT-PCR raw data	qRT-PCR raw data
Confidence interval for PCR efficiency or standard error	D	0.95	0.95
r2 of standard curve	E	qRT-PCR raw data	qRT-PCR raw data
Linear dynamic range	E	qRT-PCR raw data	qRT-PCR raw data
Cq variation at lower limit	E	qRT-PCR raw data	qRT-PCR raw data
Confidence intervals throughout range	D	0.95	0.95
Evidence for limit of detection	E	qRT-PCR raw data	qRT-PCR raw data
If multiplex, efficiency and LOD of each assay.	E	no	no
DATA ANALYSIS
qPCR analysis program (source, version)	E	qRT-PCR raw data	qRT-PCR raw data
Cq method determination	E	qRT-PCR raw data	qRT-PCR raw data
Outlier identification and disposition	E	no	no
Results of NTCs	E	qRT-PCR raw data	qRT-PCR raw data
Justification of number and choice of reference genes	E	qRT-PCR raw data	qRT-PCR raw data
Description of normalisation method	E	qRT-PCR raw data	qRT-PCR raw data
Number and concordance of biological replicates	D	qRT-PCR raw data	qRT-PCR raw data
Number and stage (RT or qPCR) of technical replicates	E	three	Page 4, lines 162-163
Repeatability (intra-assay variation)	E	qRT-PCR raw data	qRT-PCR raw data
Reproducibility (inter-assay variation, %CV)	D	qRT-PCR raw data	qRT-PCR raw data
Power analysis	D	qRT-PCR raw data	qRT-PCR raw data
Statistical methods for result significance	E	qRT-PCR raw data	qRT-PCR raw data
Software (source, version)	E	qRT-PCR raw data	qRT-PCR raw data
Cq or raw data submission using RDML	D	qRT-PCR raw data	qRT-PCR raw data

## Sheet: Sheet2
Sample	A260/280	Concentration
Drought-0h	1.99	203
Drought-1h	1.99	237
Drought-3h	2.04	228
Drought-6h	2.03	167
Drought-12h	1.98	231
Drought-24h	2.05	204
Salt-0h	2.01	237
Salt-1h	2.11	222
Salt-3h	2.04	251
Salt-6h	2.07	236
Salt-12h	2.03	270
Salt-24h	2.03	273
roots	2.03	351
stems	2.01	231
leaves	2.05	226

## Sheet: Sheet3
	1. Prepare the following mixture in a Microtube:
	Oligo dT primer 50 pmol
	(or Random primer(6 mers) 50 pmol)
	(or Gene specific primer 2 pmol)
	dNTP Mixture (10 mM each) 1 μl
	Template RNA total RNA≤5 μg, mRNA≤1μg
	RNase free dH2O up to 10 μl
	2. Heat at 65°C for 5 minutes and keep on ice.
	3. Prepare the following reaction solution in the above tube to a total volume of 20 μl.
	Template RNA/Primer mixture 10 μl
	5X PrimeScript Buffer 4 μl
	RNase Inhibitor 20 U
	PrimeScript Reverse Transcriptase 200 U
	RNase free dH2O up to 20 μl
	4. Mix gently.
	5. Carry out the reaction according to the following conditions.
	30℃ 10 min
	42℃45min
	6. Heat at 70°C for 15 minutes and then cool on ice.
